# Supplementary material for: Coupling a three-dimensional subsurface flow and transport model with a land surface model to simulate stream–aquifer–land interactions (CP v1.0)
Source: Copernicus journal article supplement (doi:10.5194/gmd-10-4539-2017), 2017-12-12
Supplement: Supplementary file 1 [file gmd-10-4539-2017-supplement.pdf]

Supplement of Geosci. Model Dev., 10, 4539–4562, 2017  
<https://doi.org/10.5194/gmd-10-4539-2017-supplement>  
© Author(s) 2017. This work is distributed under  
the Creative Commons Attribution 3.0 License.

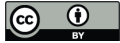

*Supplement of*

## **Coupling a three-dimensional subsurface flow and transport model with a land surface model to simulate stream–aquifer–land interactions (CP v1.0)**

**Gautam Bisht et al.**

*Correspondence to:* Maoyi Huang (maoyi.huang@pnnl.gov)

The copyright of individual parts of the supplement might differ from the CC BY 3.0 License.

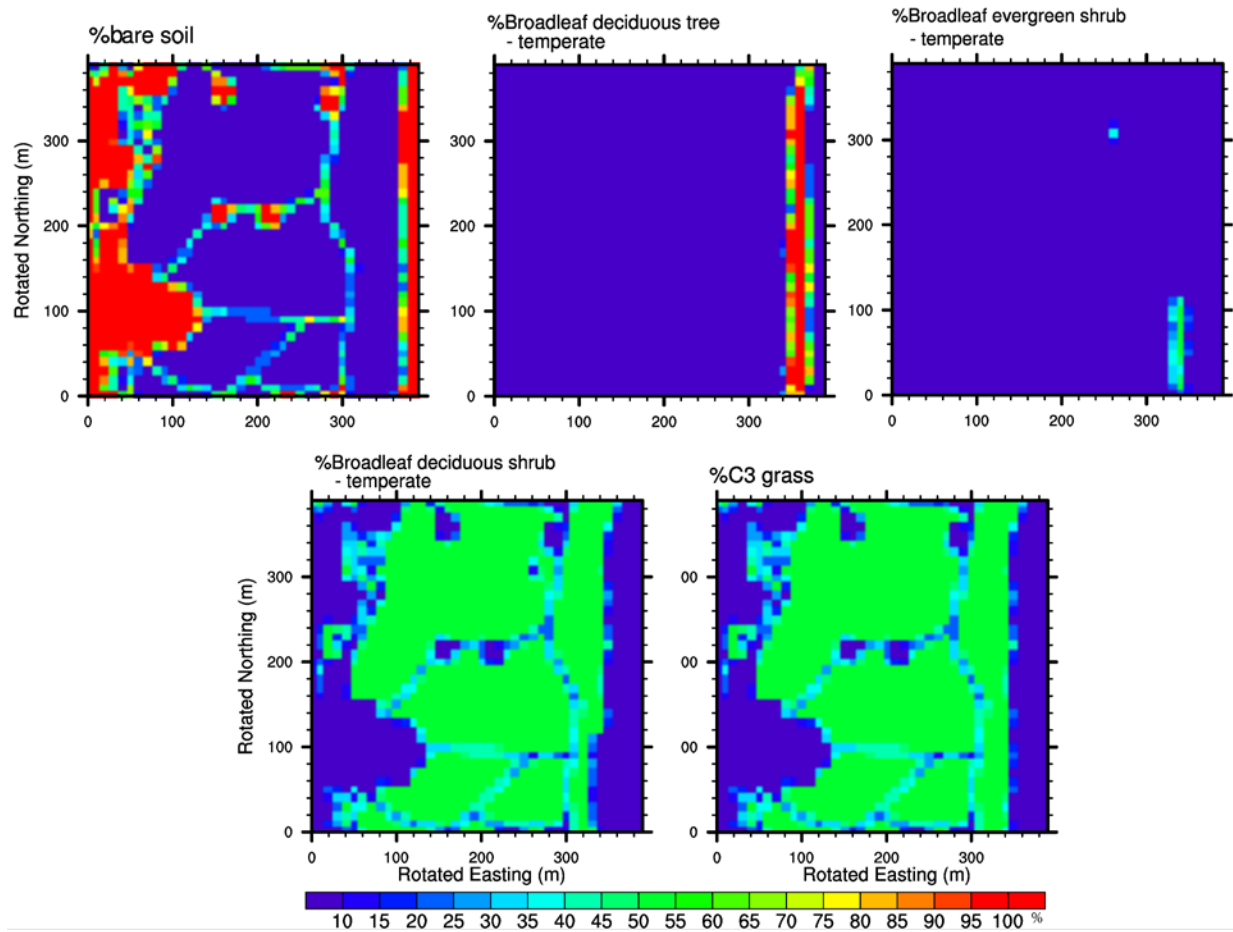

Figure S1. Plant function types at 10-m resolution as inputs for CLM4.5

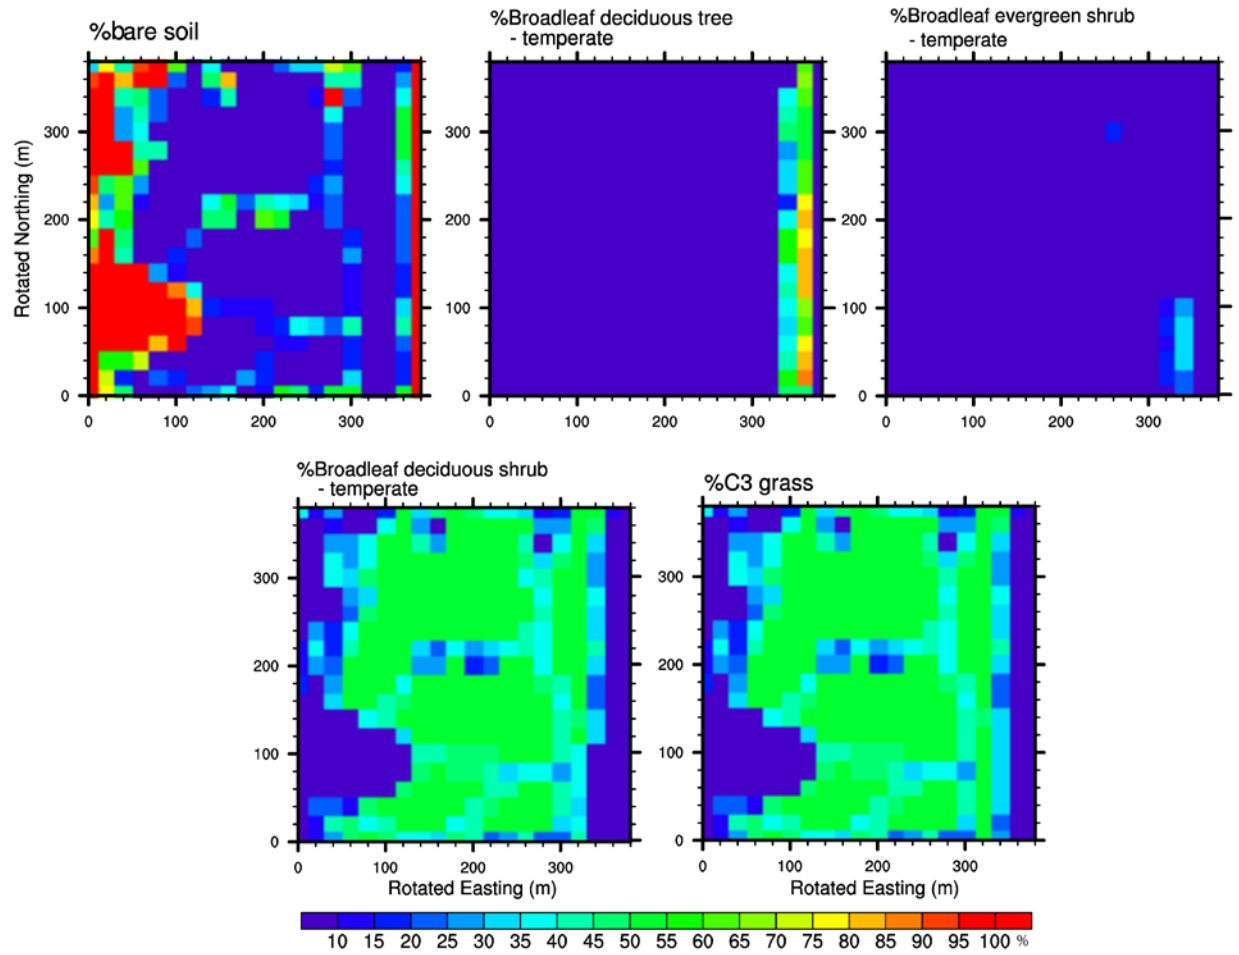

Figure S2. Plant function types at 20-m resolution as inputs for CLM4.5

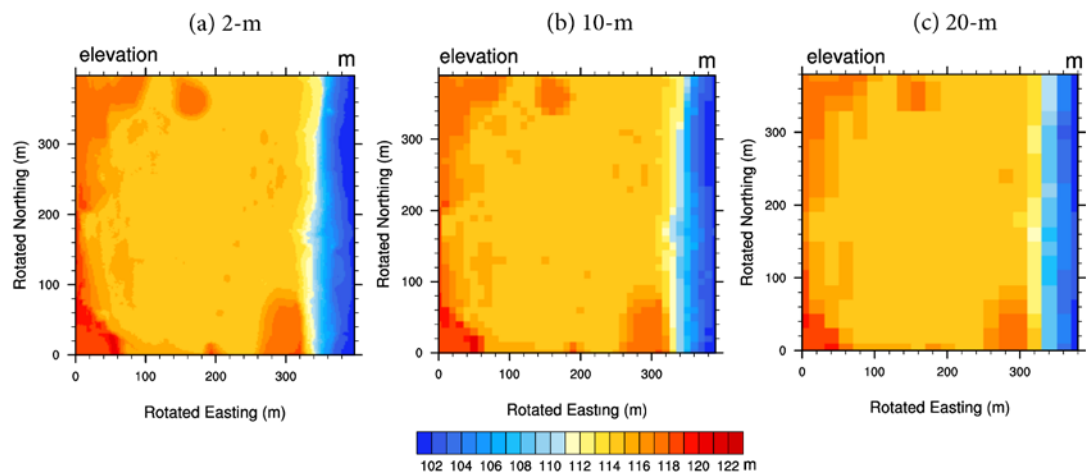

Figure S3. Topography at (a) 2-m; (b) 10-m; (c) 20-m resolutions over the study domain

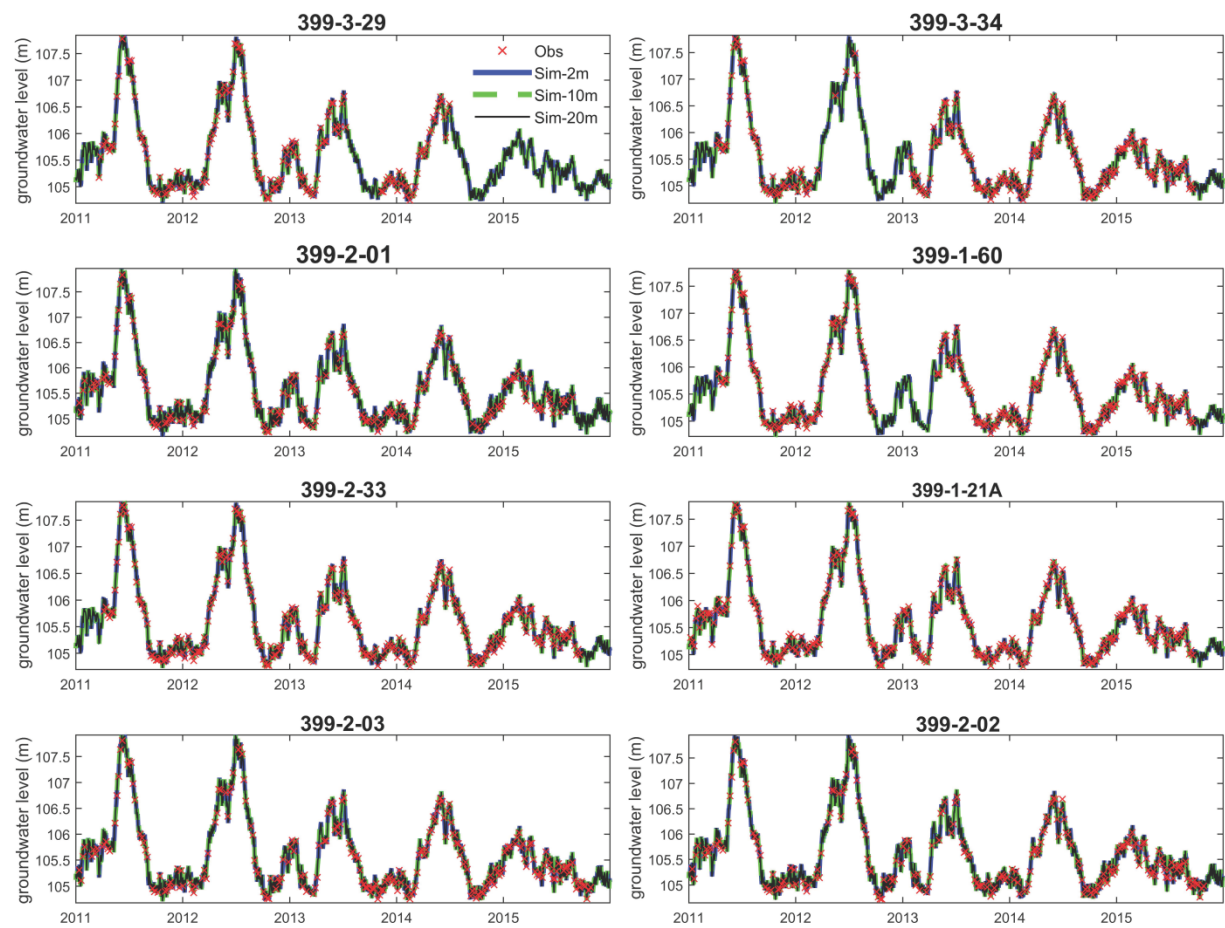

Figure S4. Comparison between simulated and observed water table levels at selected wells shown in the bottom panel of Figure 3.

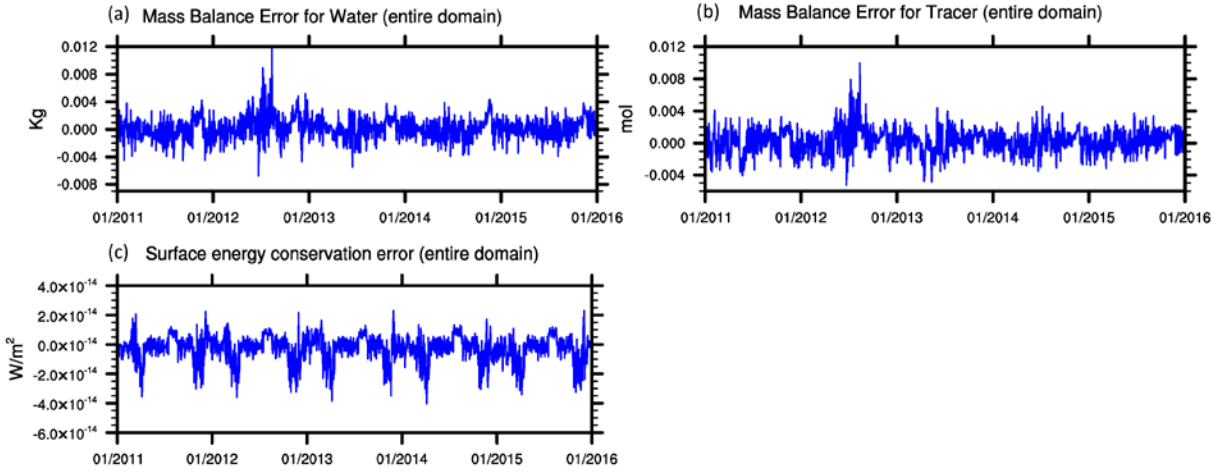

Figure S5. Mass conservation errors for (a) Water; (b) Tracer; (c) Surface Energy budget in the SE<sub>2m</sub>. The magnitudes of the surface energy budget terms are shown in Figure S10. The magnitudes of the mass storage pools and fluxes are shown in Figure S11.

# Transect, y=200m

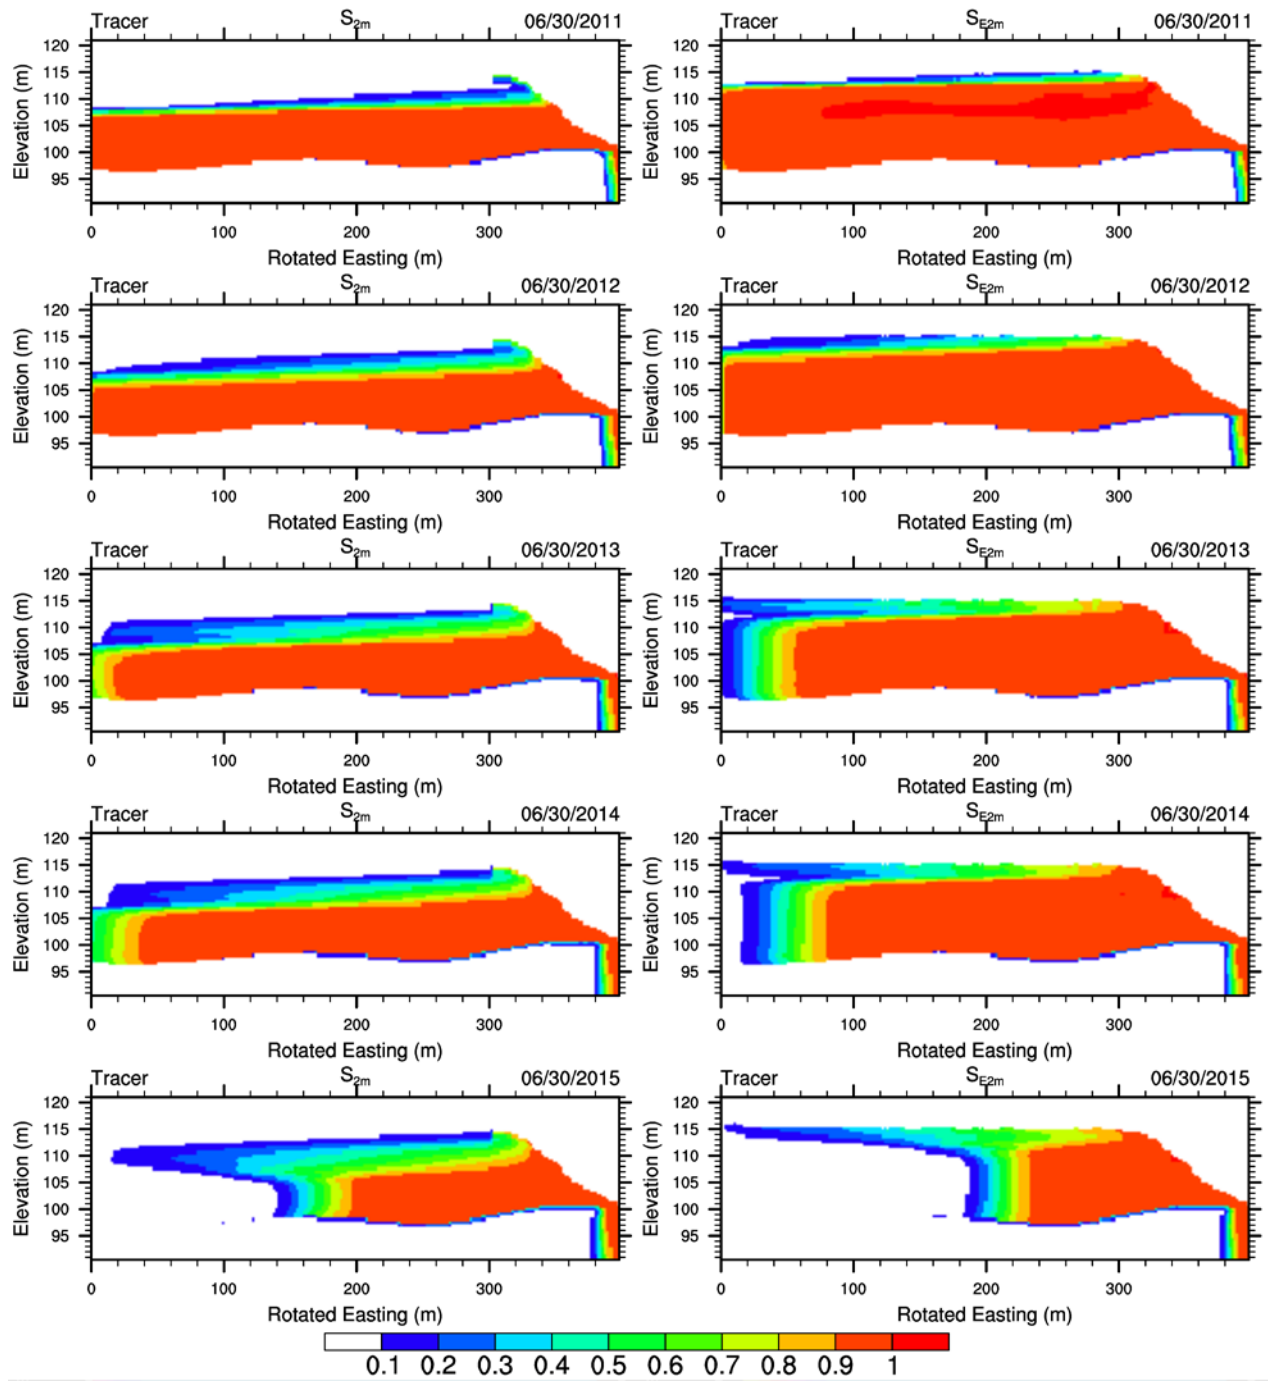

Figure S6. Mole fraction of river-water tracer across a transect perpendicular to the river (y=200 m) on 30 June of each year in study period from  $S_{2m}$  (left panels) and  $SE_{2m}$  (right panels)

# Planview, z=107m

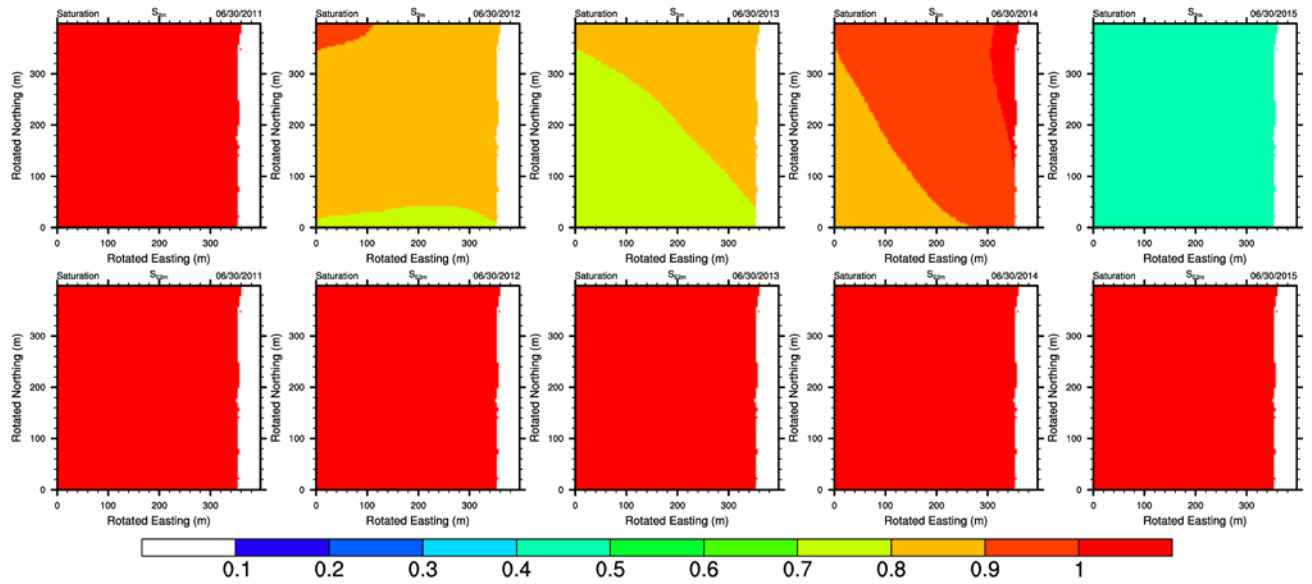

Figure S7. Liquid saturation levels (unitless) at elevation 107 m on 30 June of each year in the study period from  $S_{2m}$  (upper panels) and  $S_{E2m}$  (lower panels)

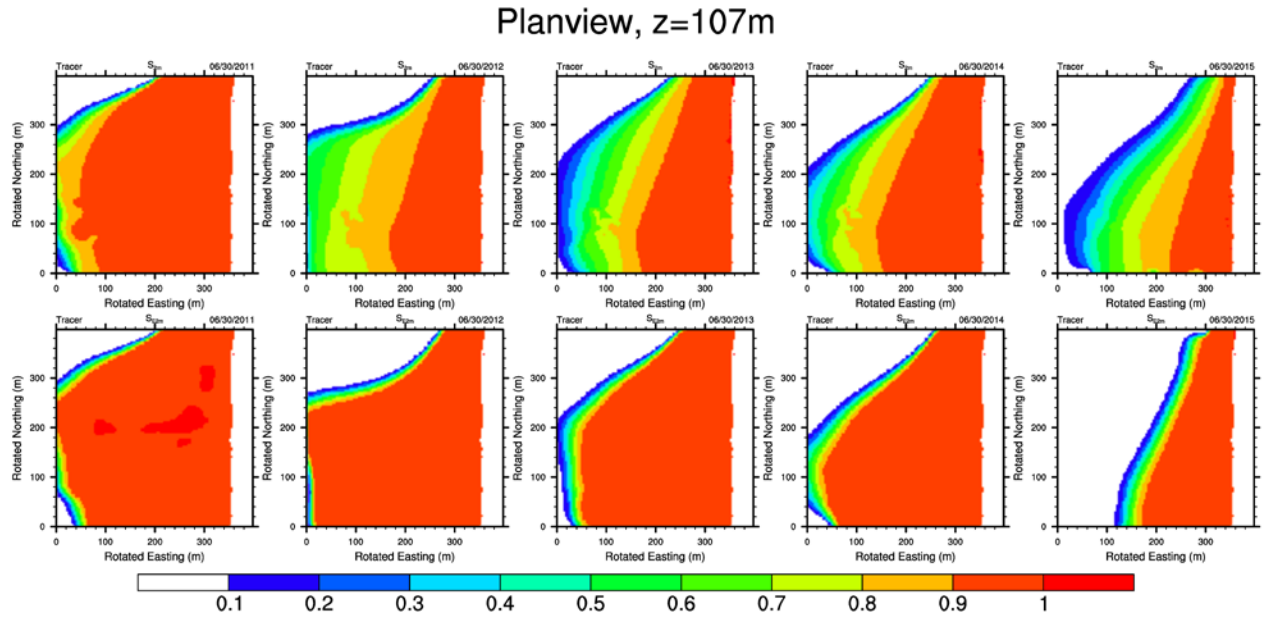

Figure S8. Mole fraction of river-water tracer at elevation 107 m on 30 June of each year in the study period from S2m (upper panels) and SE2m (lower panels)

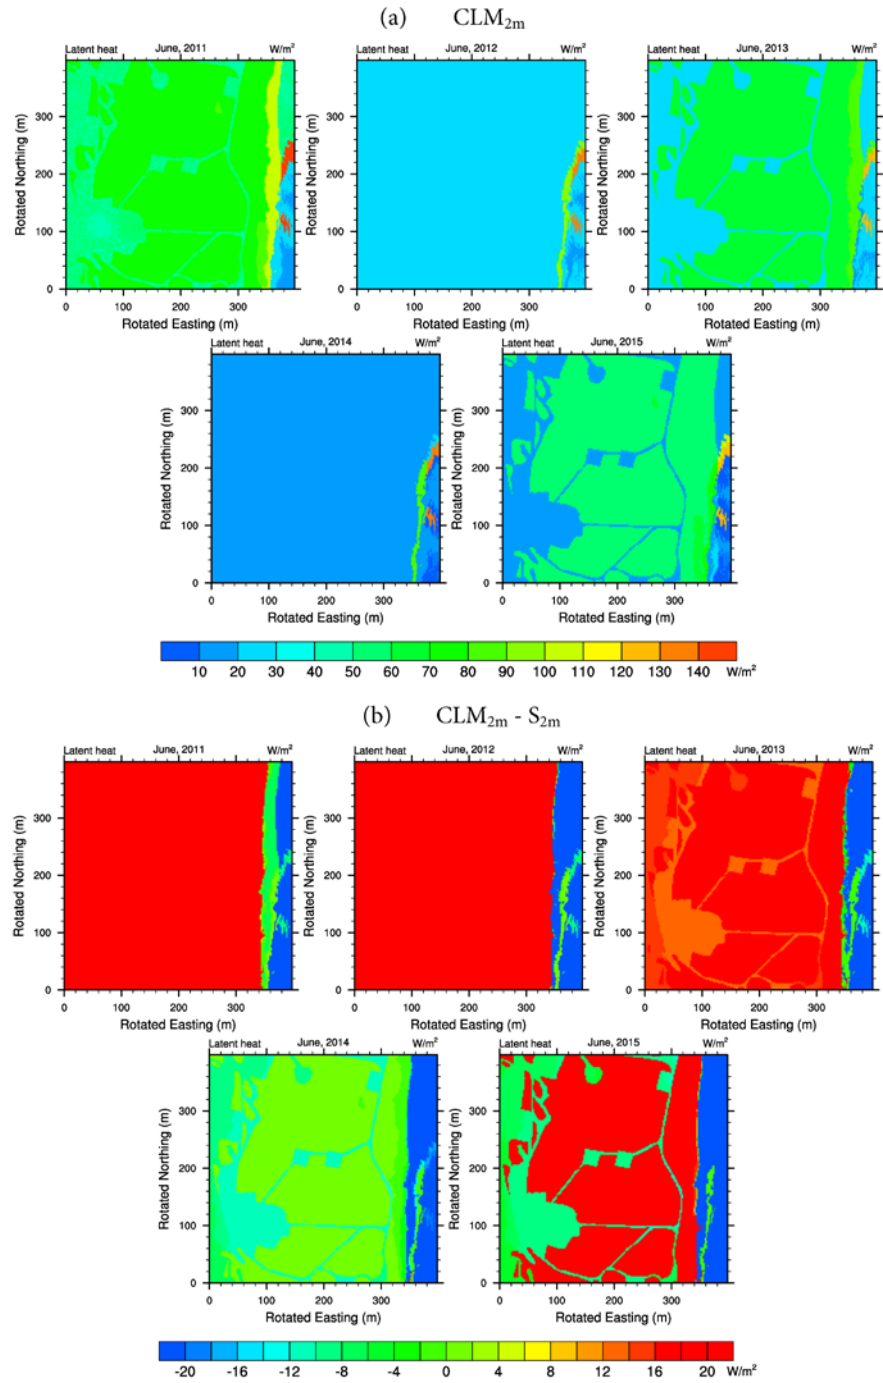

46

47 Figure S9. (a) Simulated latent heat fluxes in June from  $CLM_{2m}$ ; and (b) the difference between  $CLM_{2m}$   
 48 and  $S_{2m}$  (i.e.,  $CLM_{2m} - S_{2m}$ ).

49

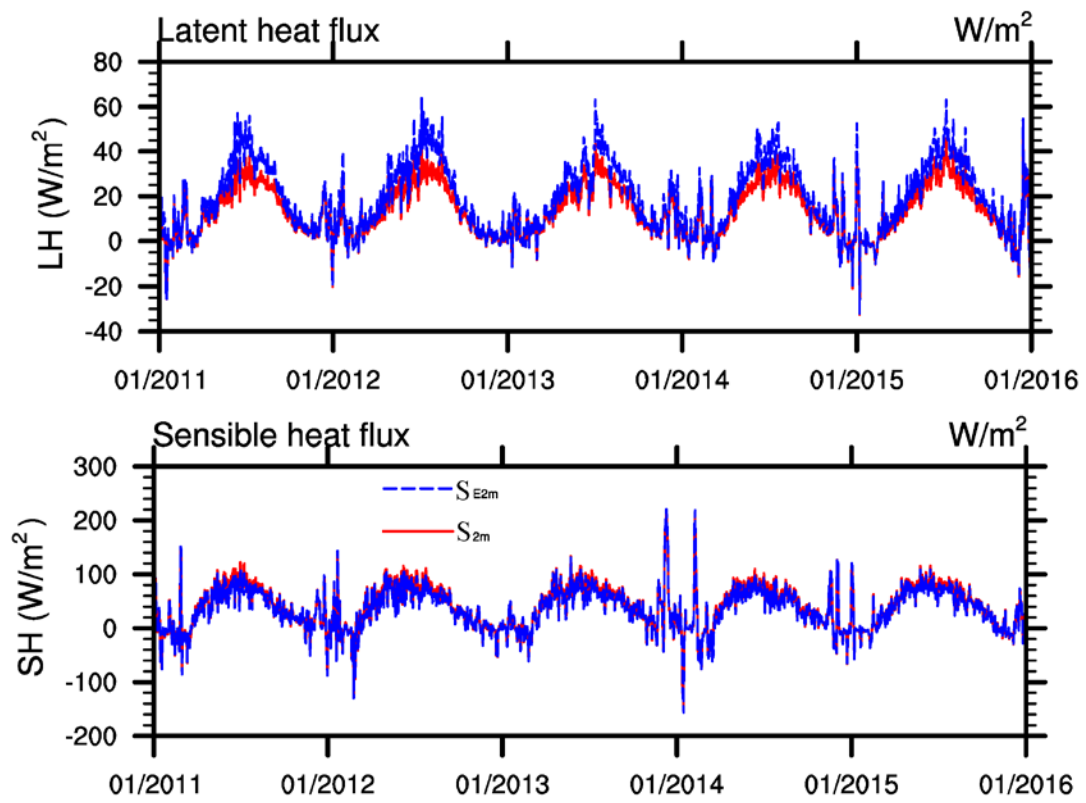

Figure S10. Simulated daily domain-averaged surface energy fluxes from  $S_{2m}$  (red) and  $S_{E2m}$  (blue)

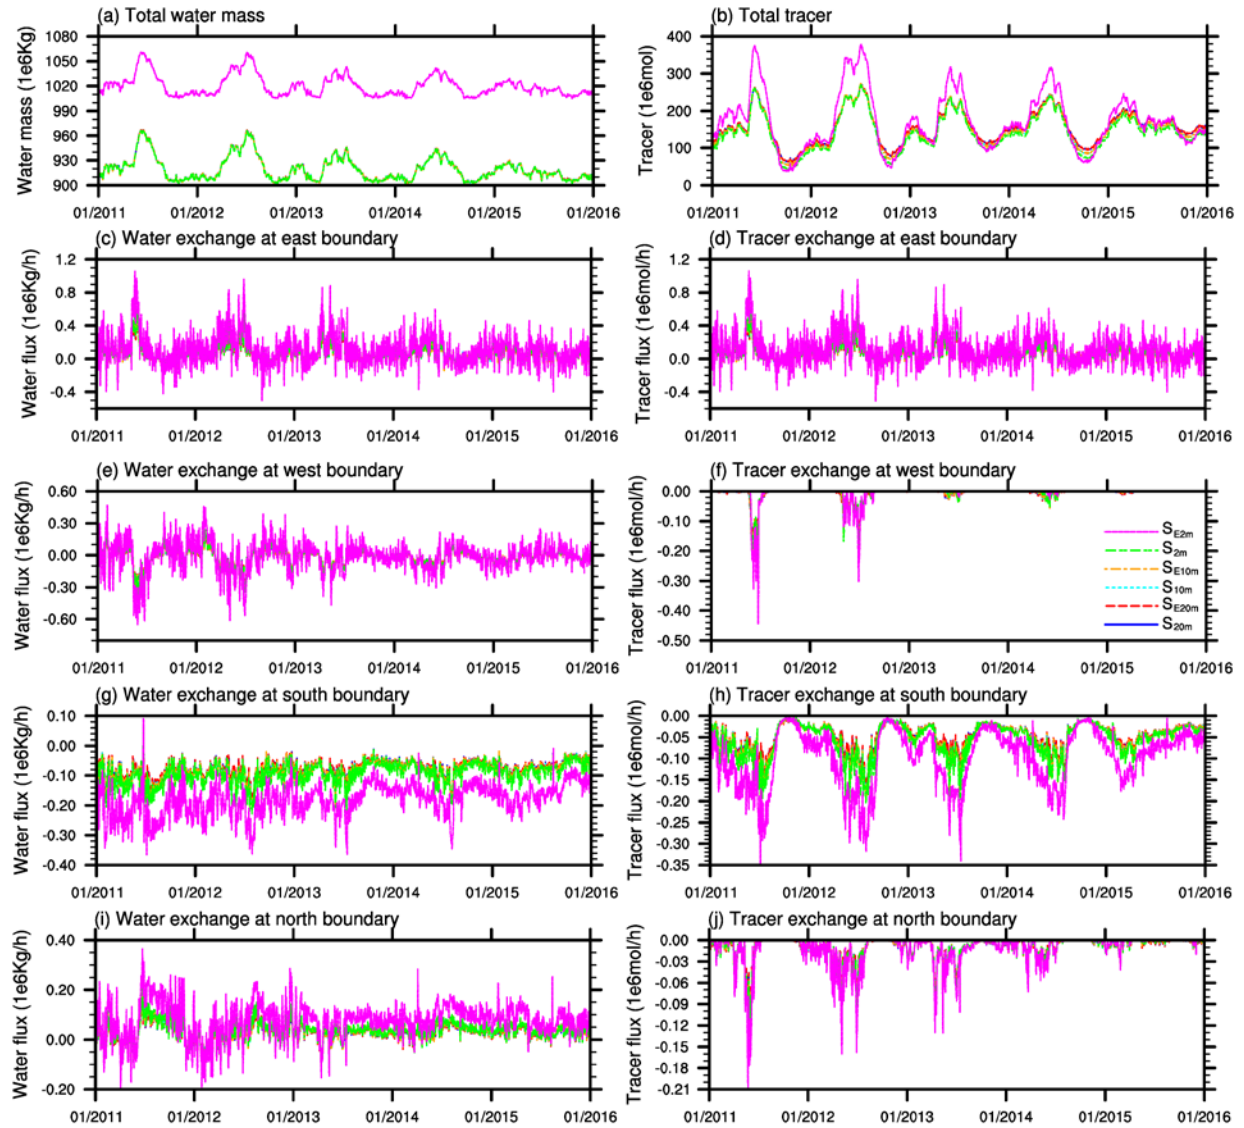

Figure S11. Total water mass, tracer amount, and exchange rates of water and tracer at four boundaries simulated by CP v1.0.
